# Supplementary material
Source: PubMed Central journal article supplement (PMC3862256)
Supplement: NIHMS532931-supplement-ST1.pdf [file NIHMS532931-supplement-ST1.pdf]

**Supplementary Table I. Stratified relative risk of non-Hodgkin lymphoma (NHL) after first primary solid cancer according to initial radiotherapy treatment by sex**

| First Primary Cancer                                    | Radiotherapy |      | No Radiotherapy |      | RR* and 95% CI   | Phomogeneity |
|---------------------------------------------------------|--------------|------|-----------------|------|------------------|--------------|
|                                                         | Obs          | SIR  | Obs             | SIR  |                  |              |
| <b>All solid cancers</b>                                |              |      |                 |      |                  |              |
| Males                                                   | 1,120        | 1.18 | 2,352           | 1.02 | 1.22 (1.13-1.32) | 0.003        |
| Females                                                 | 622          | 0.94 | 1,496           | 0.93 | 1.01 (0.92-1.11) |              |
| <b>All standard radiotherapy treated solid cancers†</b> |              |      |                 |      |                  |              |
| Males                                                   | 968          | 1.09 | 1,249           | 0.90 | 1.21 (1.11-1.32) | 0.145        |
| Females                                                 | 577          | 0.93 | 942             | 0.89 | 1.05 (0.95-1.17) |              |
| <b>Oral cavity &amp; pharynx</b>                        |              |      |                 |      |                  |              |
| Males                                                   | 55           | 1.30 | 62              | 1.10 | 0.91 (0.59-1.41) | >0.50        |
| Females                                                 | 18           | 1.08 | 30              | 1.39 | 0.77 (0.40-1.51) |              |
| <b>Larynx</b>                                           |              |      |                 |      |                  |              |
| Males                                                   | 52           | 1.05 | 18              | 1.14 | 0.99 (0.57-1.75) | >0.50        |
| Females                                                 | 7            | 0.86 | 5               | 1.79 | 0.53 (0.17-1.69) |              |
| <b>Thyroid</b>                                          |              |      |                 |      |                  |              |
| Males                                                   | 21           | 1.68 | 9               | 0.57 | 2.46 (1.10-5.48) | 0.167        |
| Females                                                 | 24           | 1.18 | 38              | 1.08 | 0.96 (0.56-1.64) |              |
| <b>Lung &amp; bronchus (NSC)</b>                        |              |      |                 |      |                  |              |
| Males                                                   | 40           | 1.17 | 80              | 0.90 | 1.28 (0.83-1.98) | 0.493        |
| Females                                                 | 22           | 1.18 | 55              | 0.87 | 2.10 (1.17-3.76) |              |
| <b>Rectum &amp; rectosigmoid junction</b>               |              |      |                 |      |                  |              |
| Males                                                   | 50           | 1.10 | 79              | 0.82 | 1.02 (0.63-1.66) | 0.416        |
| Females                                                 | 28           | 1.25 | 51              | 0.84 | 1.85 (1.01-3.39) |              |

Abbreviations: NSC, non-small cell; Obs, observed; SIR, standardized incidence ratio; RR, relative risk; CI, confidence interval

\*Poisson regression modeling used to estimate RR of NHL comparing radiotherapy treatment groups for first primary cancer stratified by sex, age, stage, and chemotherapy.

†Includes oral cavity & pharynx, rectosigmoid junction & rectum, larynx, lung & bronchus (NSC), female breast, cervix uteri, endometrial, prostate, testis, and thyroid cancers.
