# Supplementary material
Source: PubMed Central journal article supplement (PMC3862256)
Supplement: NIHMS532931-supplement-ST2.pdf [file NIHMS532931-supplement-ST2.pdf]

**Supplementary Table II. Stratified relative risk of non-Hodgkin lymphoma (NHL) after first primary solid cancer according to initial radiotherapy treatment by age**

| First Primary Cancer                                               | Radiotherapy |      | No Radiotherapy |      | RR* and 95% CI   | Ptrend |
|--------------------------------------------------------------------|--------------|------|-----------------|------|------------------|--------|
|                                                                    | Obs          | SIR  | Obs             | SIR  |                  |        |
| <b>All solid cancers</b>                                           |              |      |                 |      |                  |        |
| <40                                                                | 81           | 2.55 | 263             | 3.09 | 1.02 (0.68-1.52) | >0.50  |
| 40-54                                                              | 249          | 1.31 | 532             | 1.11 | 1.28 (1.08-1.52) |        |
| 55-64                                                              | 421          | 1.03 | 1,041           | 0.93 | 1.12 (1.00-1.26) |        |
| 65-74                                                              | 733          | 1.00 | 1,468           | 0.90 | 1.11 (1.01-1.21) |        |
| 75+                                                                | 258          | 1.03 | 544             | 0.90 | 1.12 (0.96-1.31) |        |
| <b>All standard radiotherapy treated solid cancers<sup>†</sup></b> |              |      |                 |      |                  |        |
| <40                                                                | 32           | 1.21 | 58              | 1.31 | 0.92 (0.59-1.44) | >0.50  |
| 40-54                                                              | 187          | 1.09 | 234             | 0.85 | 1.33 (1.09-1.62) |        |
| 55-64                                                              | 386          | 1.03 | 648             | 0.92 | 1.11 (0.98-1.27) |        |
| 65-74                                                              | 693          | 1.00 | 941             | 0.89 | 1.11 (1.00-1.23) |        |
| 75+                                                                | 247          | 1.04 | 310             | 0.85 | 1.20 (1.01-1.43) |        |
| <b>Oral cavity &amp; pharynx</b>                                   |              |      |                 |      |                  |        |
| <55                                                                | 16           | 1.13 | 22              | 1.42 | 1.21 (0.57-2.56) | 0.405  |
| 55-64                                                              | 28           | 1.39 | 23              | 0.94 | 1.10 (0.57-2.15) |        |
| 65+                                                                | 29           | 1.18 | 47              | 1.24 | 0.63 (0.37-1.09) |        |
| <b>Larynx</b>                                                      |              |      |                 |      |                  |        |
| <55                                                                | 8            | 0.91 | 5               | 1.55 | 0.62 (0.20-1.90) | >0.50  |
| 55-64                                                              | 19           | 0.90 | 10              | 1.37 | 0.85 (0.37-1.96) |        |
| 65+                                                                | 32           | 1.15 | 8               | 0.99 | 1.08 (0.49-2.35) |        |
| <b>Thyroid</b>                                                     |              |      |                 |      |                  |        |
| <55                                                                | 22           | 1.40 | 22              | 0.87 | 1.41 (0.75-2.65) | >0.50  |
| 55-64                                                              | 14           | 1.69 | 13              | 0.97 | 1.46 (0.66-3.21) |        |
| 65+                                                                | 9            | 1.02 | 12              | 0.98 | 0.92 (0.38-2.22) |        |
| <b>Lung &amp; bronchus (NSC)</b>                                   |              |      |                 |      |                  |        |
| <55                                                                | 11           | 1.77 | 12              | 0.75 | 2.92 (0.99-8.59) | >0.50  |
| 55-64                                                              | 22           | 1.46 | 42              | 0.96 | 1.65 (0.91-3.01) |        |
| 65+                                                                | 29           | 0.92 | 81              | 0.88 | 1.32 (0.81-2.13) |        |
| <b>Female breast</b>                                               |              |      |                 |      |                  |        |

|                                           |     |      |     |      |                  |       |
|-------------------------------------------|-----|------|-----|------|------------------|-------|
| <55                                       | 91  | 0.96 | 113 | 0.81 | 1.17 (0.88-1.55) | 0.318 |
| 55-64                                     | 116 | 0.93 | 187 | 0.95 | 1.00 (0.79-1.26) |       |
| 65-74                                     | 112 | 0.76 | 205 | 0.85 | 0.89 (0.70-1.12) |       |
| 75+                                       | 36  | 0.73 | 81  | 0.90 | 0.79 (0.53-1.17) |       |
| <b>Cervix uteri</b>                       |     |      |     |      |                  |       |
| <55                                       | 12  | 1.39 | 20  | 1.23 | 1.58 (0.72-3.46) | 0.318 |
| 55+                                       | 18  | 1.20 | 13  | 1.26 | 0.59 (0.26-1.36) |       |
| <b>Endometrium</b>                        |     |      |     |      |                  |       |
| <55                                       | 11  | 0.99 | 33  | 1.09 | 0.77 (0.37-1.60) | 0.187 |
| 55-64                                     | 32  | 0.98 | 51  | 0.77 | 1.22 (0.77-1.94) |       |
| 65+                                       | 50  | 1.03 | 60  | 0.71 | 1.49 (1.01-2.18) |       |
| <b>Prostate</b>                           |     |      |     |      |                  |       |
| <55                                       | 17  | 1.24 | 44  | 0.99 | 1.36 (0.77-2.39) | >0.50 |
| 55-64                                     | 124 | 1.00 | 278 | 0.92 | 1.11 (0.89-1.38) |       |
| 65-74                                     | 425 | 1.06 | 518 | 0.91 | 1.15 (1.01-1.31) |       |
| 75+                                       | 162 | 1.12 | 151 | 0.79 | 1.44 (1.14-1.82) |       |
| <b>Testis</b>                             |     |      |     |      |                  |       |
| <40                                       | 10  | 1.25 | 6   | 0.63 | 2.01 (0.64-6.30) | >0.50 |
| 40+                                       | 12  | 1.27 | 4   | 0.73 | 1.18 (0.38-3.65) |       |
| <b>Rectum &amp; rectosigmoid junction</b> |     |      |     |      |                  |       |
| <55                                       | 12  | 1.27 | 13  | 0.77 | 0.97 (0.29-3.26) | 0.125 |
| 55-64                                     | 19  | 0.87 | 36  | 0.76 | 0.57 (0.27-1.18) |       |
| 65+                                       | 47  | 1.28 | 81  | 0.88 | 1.86 (1.18-2.94) |       |

Abbreviations: NSC, non-small cell; Obs, observed; SIR, standardized incidence ratio; RR, relative risk; CI, confidence interval

\*Poisson regression modeling used to estimate RR of NHL comparing radiotherapy treatment groups for first primary cancer stratified by sex,

age, stage, and chemotherapy.

†Includes oral cavity & pharynx, rectosigmoid junction & rectum, larynx, lung & bronchus (NSC), female breast, cervix uteri, endometrial, prostate, testis, and thyroid cancers.
